# Supplementary material
Source: Springer Nature journal article supplement (https://www.springermedizin.de/resource/supplementary/12933_2010_272_MOESM6_ESM.pdf/9539988)

Percent of all patients

0 20 40 60 80 100

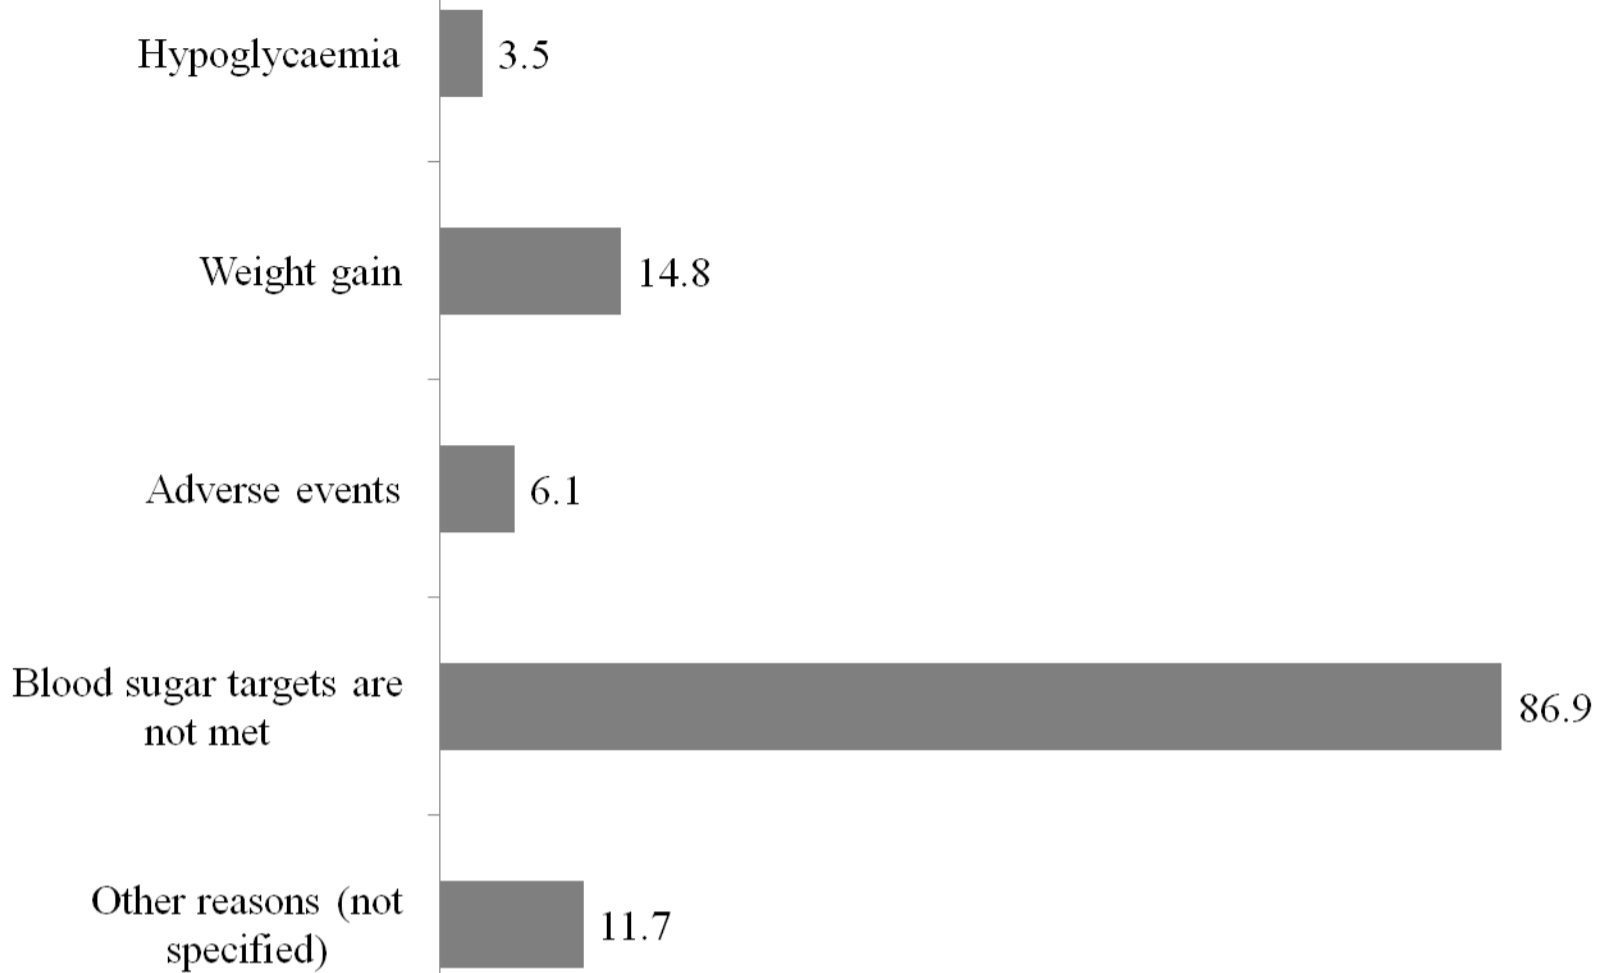

Percent of all patients

0 20 40 60 80 100

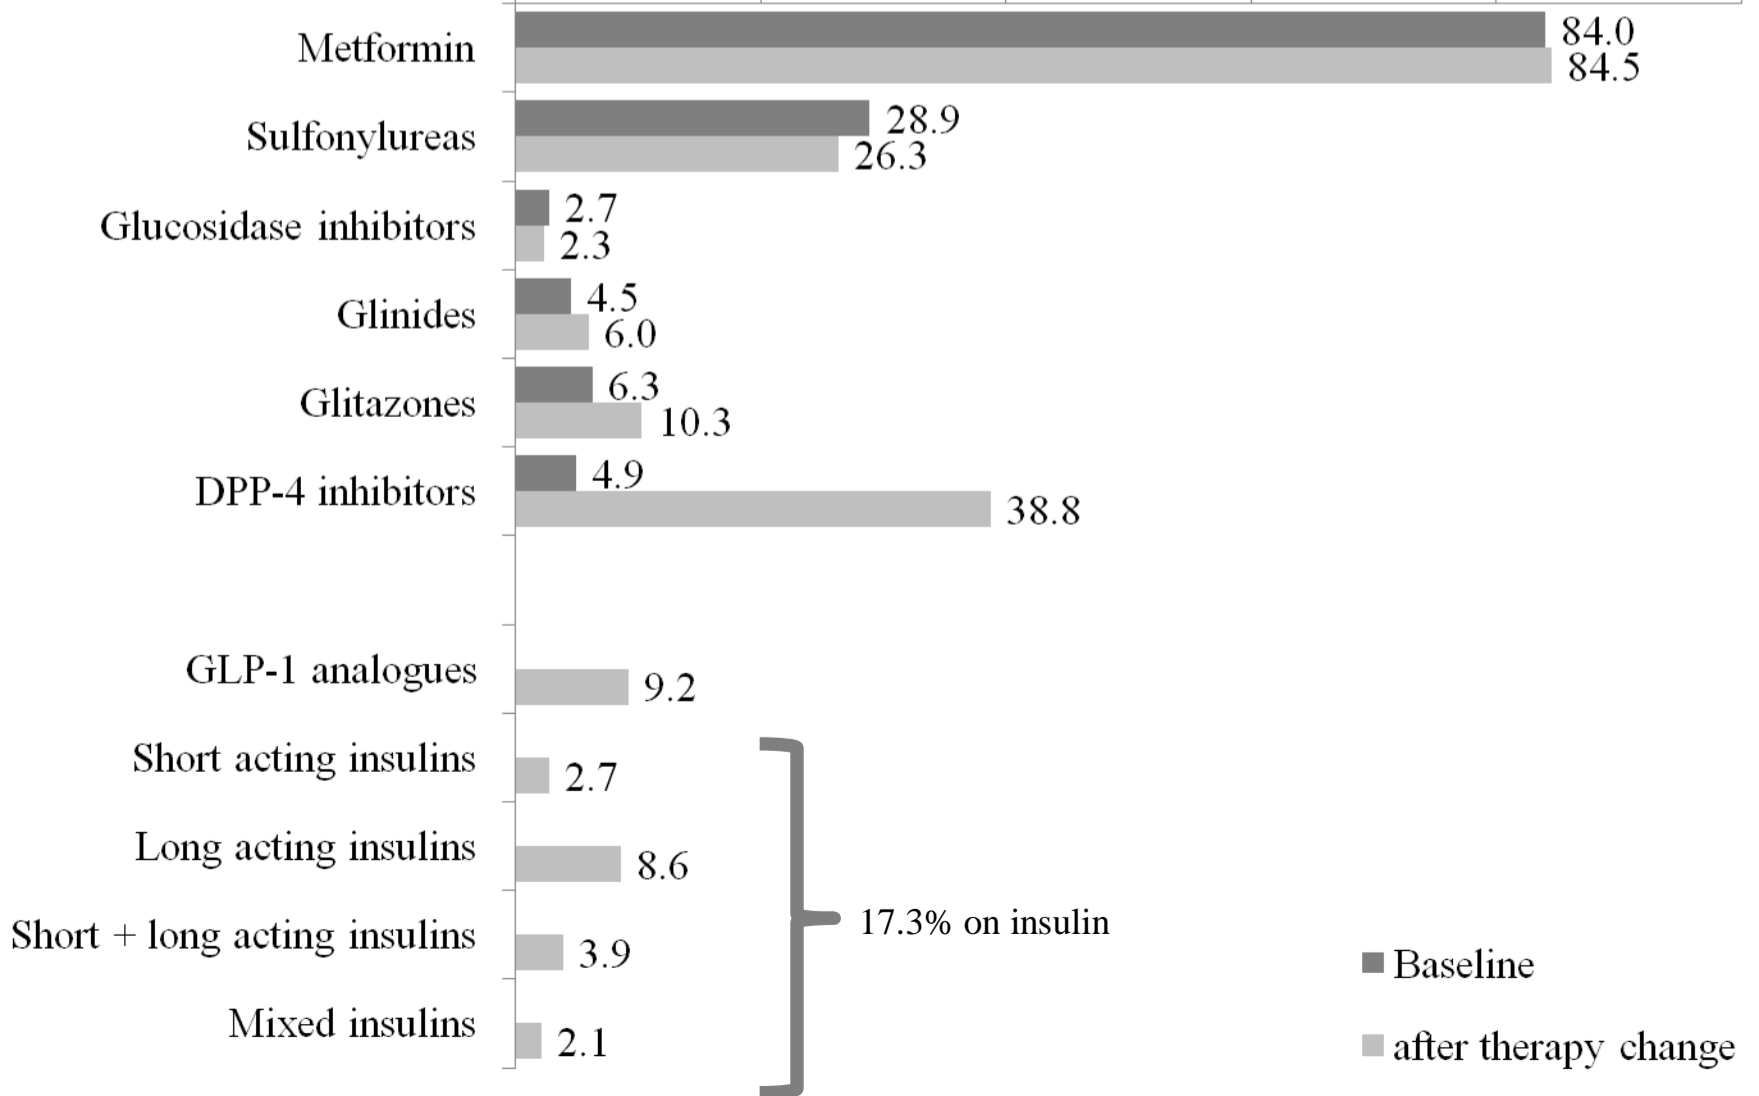

Supplement: MOESM6 [file 9539988]
